# Supplementary material
Source: PubMed Central journal article supplement (PMC2743179)
Supplement: NIHMS92654-supplement-suppfig1.pdf [file NIHMS92654-supplement-suppfig1.pdf]

14,648 14,649 14,650 14,651 14,652 14,653 14,654 14,655 14,656 14,657 14,658 14,659 14,660 14,661

kb

SNPs in the 500K SNP array

■

■ ■■■ ■■ ■

Known CNV

CNP119

—————

Inferred deletion patterns among 100 subjects:

Type I

N = 88 (case/control: 52/36)

—————

Type II

N = 6 (case/control: 5/1)

—————

Type III

N = 5 (case/control: 2/3)

—————

Type IV

N = 1 (case/control: 1/0)

—————

Type V

N = 1 (case/control: 1/0)

—————
