# Supplementary material
Source: PubMed Central journal article supplement (PMC2743179)

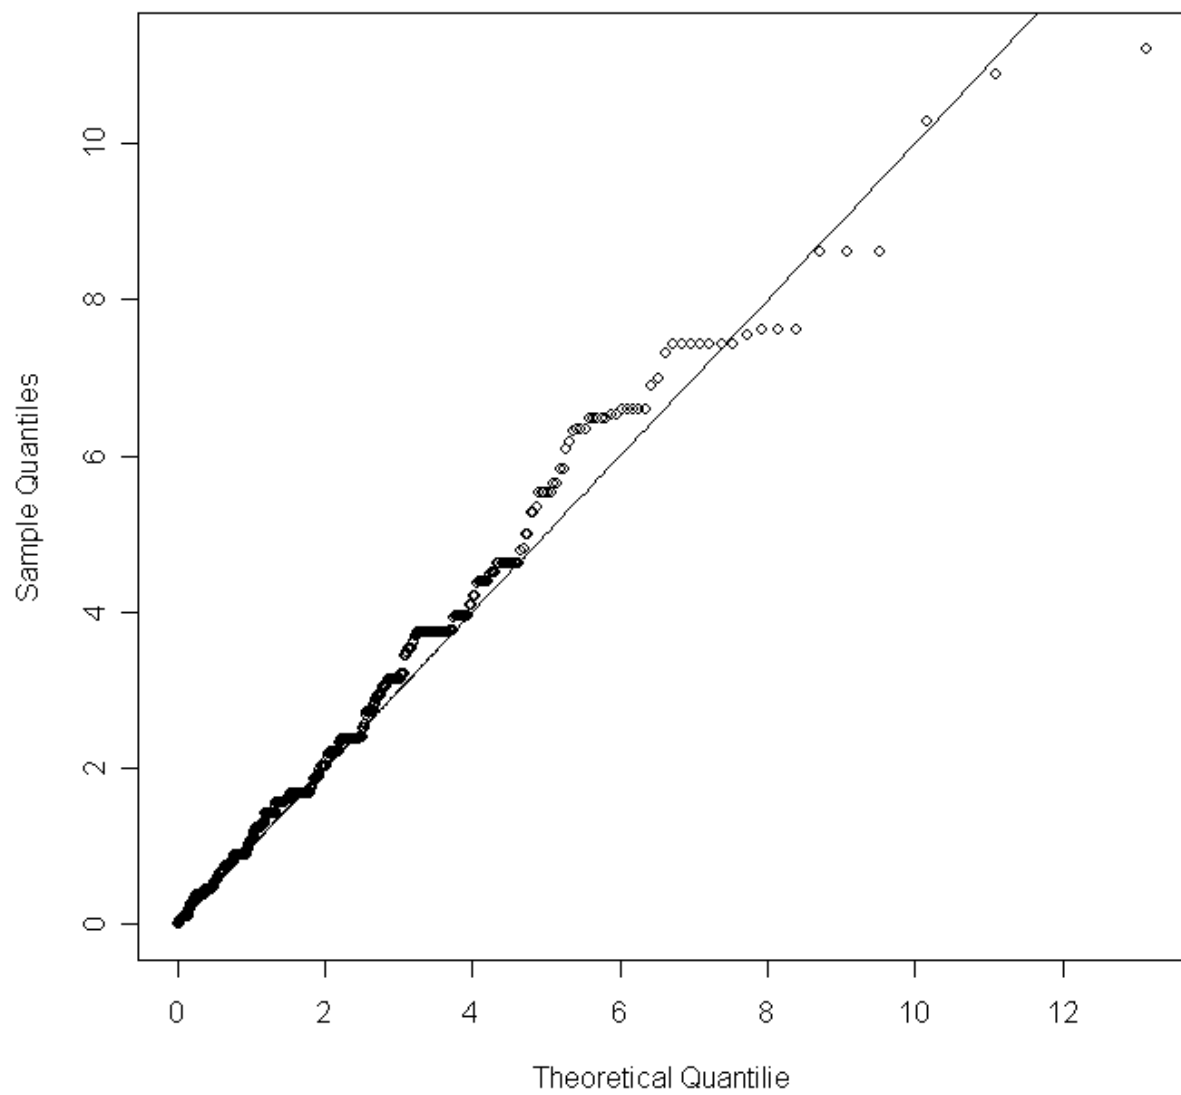

Supplement: NIHMS92654-supplement-suppfig2.pdf [file NIHMS92654-supplement-suppfig2.pdf]
